# Supplementary material for: One-pot synthesis of Pt hollow spheres and their performance on electrochemical catalysis
Source: Royal Society of Chemistry journal article supplement (doi:10.1039/c5nj00595g), 2015-01-01
Supplement: c5nj00595g1.pdf [file c5nj00595g1.pdf]

## Supporting Information for

# One-Pot Synthesis of Pt Hollow Spheres and Their Performance on Electrochemical Catalysis

*Guanhua Lin<sup>a, b\*</sup>, Wensheng Lu<sup>b</sup>*

a. Center for BioImaging Sciences, Department of Biological Sciences, National University of Singapore,  
Science Drive 4, Singapore, 117543.

b. Beijing National Laboratory for Molecular Sciences, Key Laboratory of Colloids and Surfaces, Institute of  
Chemistry, Chinese Academy of Sciences, Beijing 100190, People's Republic of China

\*Corresponding author. E-mail: [linguanhua01@gmail.com](mailto:linguanhua01@gmail.com)

**Fig. S1. TEM image of Pt hollow spheres**

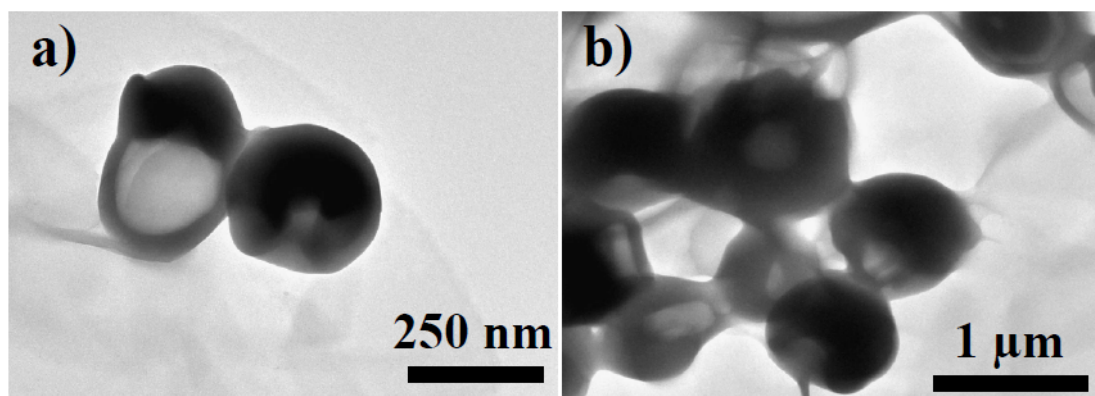

Fig. S1. TEM images of Pt hollow microspheres: (a) is obtained with 0.25 mM C18N3 and (b) is obtained with 0.125 mM C18N3.

## S2. Calculation of surface area of Pt hollow spheres

According to the formula of  $V_m = \frac{4}{3}\pi r^3$ , the pore volume of the two Pt hollow spheres is  $4.6 \times 10^{-18} \text{ m}^3$  and  $1.3 \times 10^{-18} \text{ m}^3$ , and porosity of the two Pt hollow spheres is about 72% and 62%, respectively. The total surface area (inner surface area + outer surface area) of the two Pt hollow spheres can also be calculated by  $S = 4\pi r^2$ , which is  $2.4 \times 10^{-11} \text{ m}^2$  and  $1.1 \times 10^{-11} \text{ m}^2$ , respectively. Taking the big Pt hollow spheres as an example, about 3.6 Pt hollow spheres would be equal weight with 1 Pt microsphere if they have equal volume. The surface area for Pt microsphere is  $1.3 \times 10^{-11} \text{ m}^2$ , but for equal weight of Pt hollow spheres, the total surface area is  $8.6 \times 10^{-11} \text{ m}^2$ , which is 6.6-fold higher than that of Pt microsphere.

**Fig. S3. SEM images of Pt hollow spheres obtained with different surfactant (C18N3) concentration.**

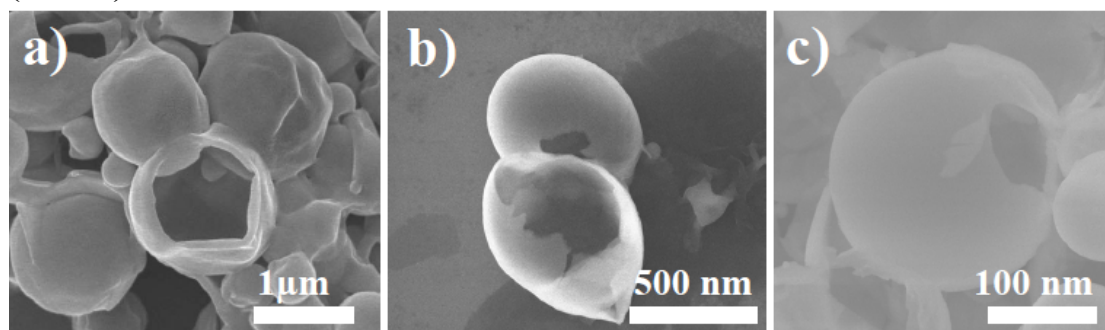

Fig. S3. SEM images of Pt hollow microspheres: obtained with various concentration of C18N3: (a) 1 mM, (b) 0.5 mM and (c) 0.125 mM C18N3.

**Fig. S4. SEM images and EDX analysis of the vesicle- $\text{K}_2\text{PtCl}_4$  complexes.**

To do the SEM and EDX analysis, the vesicle- $\text{K}_2\text{PtCl}_4$  complexes were dropped onto a Si wafer and dried at room temperature.

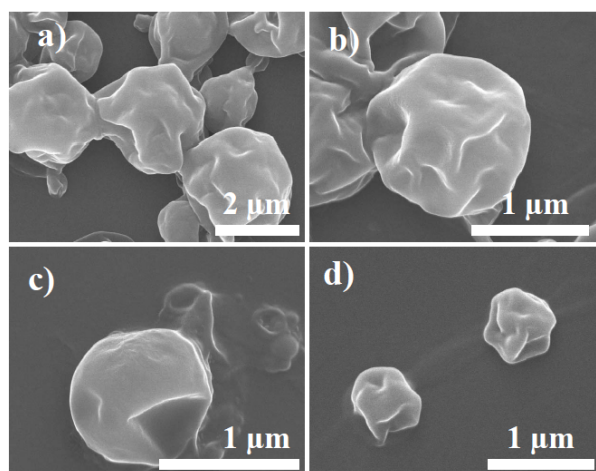

Fig. S4. SEM images of the vesicle- $\text{K}_2\text{PtCl}_4$  complexes obtained with various concentrations of C18N3: (a) 2 mM, (b) 1 mM, (c) 0.5 mM and (d) 0.25 mM.

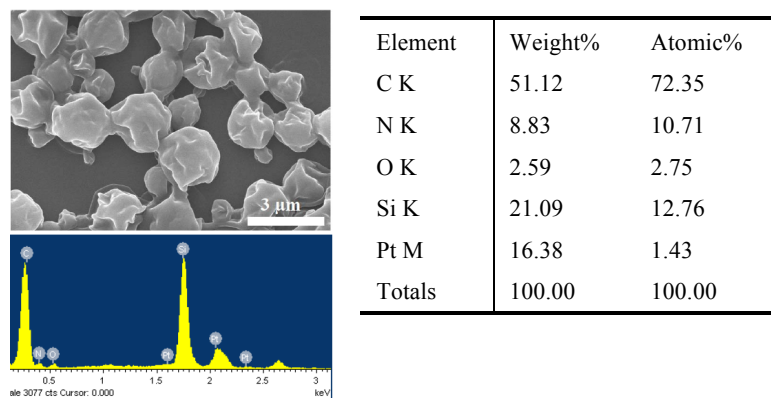

**Fig. S5. SEM image of Pt nanoparticles.**

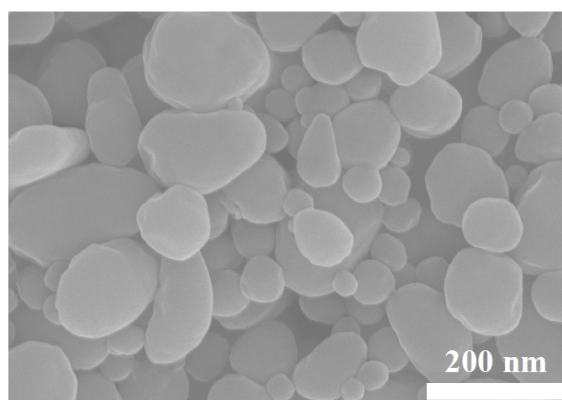

Fig. S5. SEM image of Pt hollow spheres obtained with 2 mM C18N3 and 0.4 mM K<sub>2</sub>PtCl<sub>4</sub>, heating at 80 °C.
